# Supplementary material
Source: Springer Nature journal article supplement (https://www.springermedizin.de/resource/supplementary/12887_2011_549_MOESM4_ESM.pdf/9475544)

amount of infants with CPAP as percentage of all infants

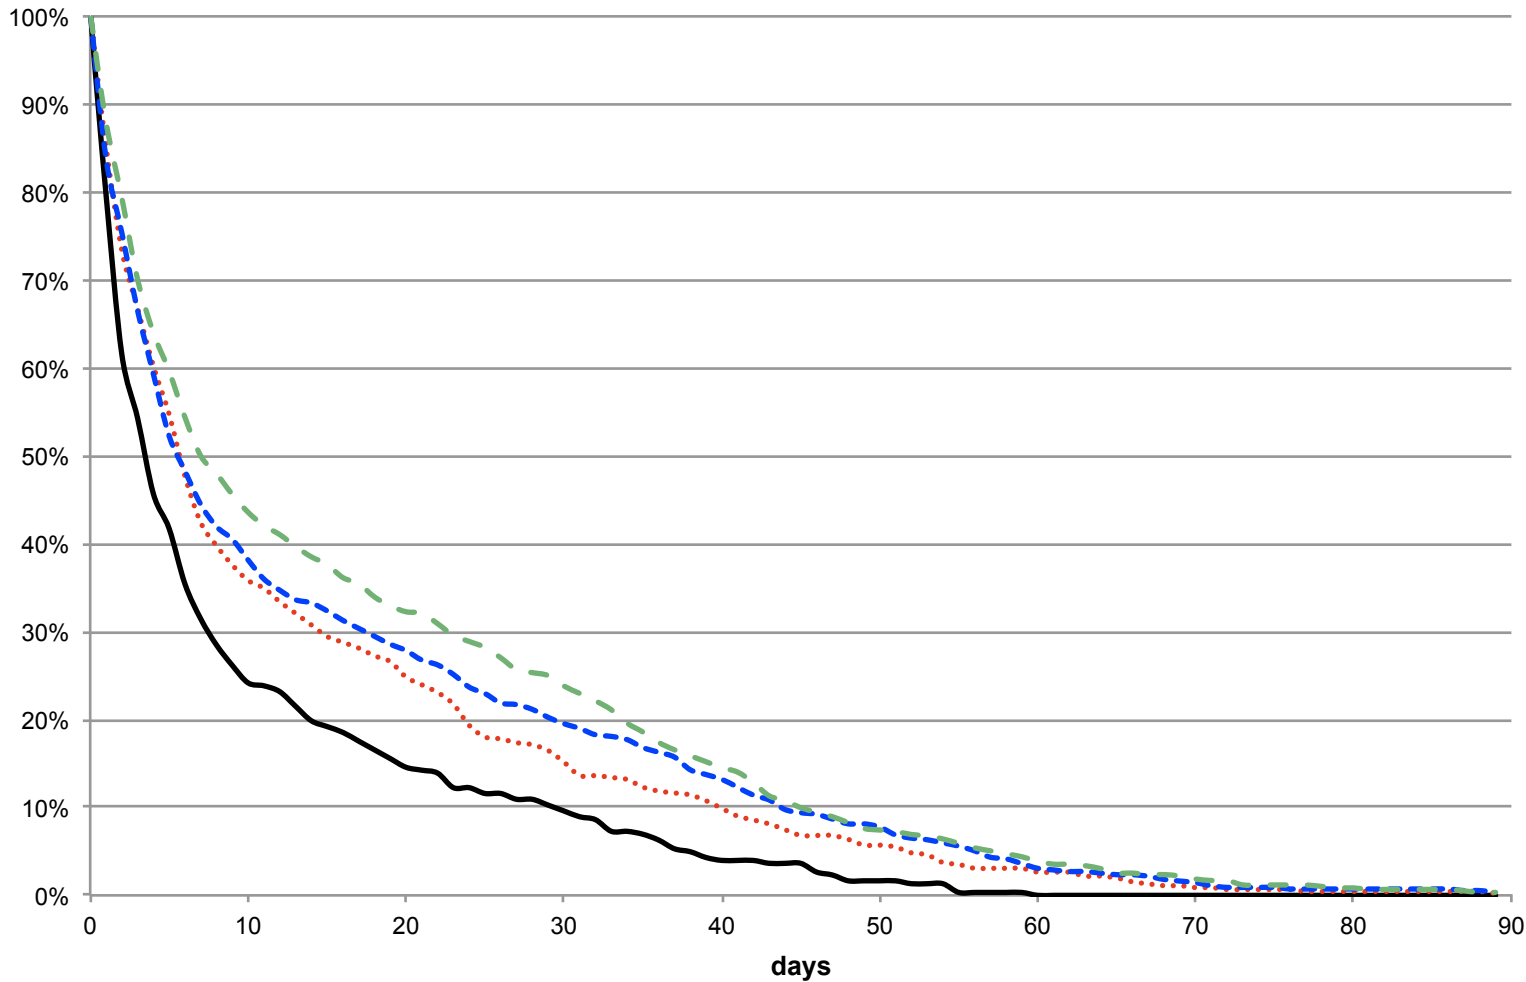

— 1996    ···· 2000    - - - 2004    - - - 2008

Supplement: MOESM4 [file 9475544]
